# Supplementary material for: Can an eight π-electron bare ring be planar?
Source: Royal Society of Chemistry journal article supplement (doi:10.1039/c1cp22415h), 2011-01-01
Supplement: c1cp22415h.pdf [file c1cp22415h.pdf]

## Supplementary Information

### Can an eight $\pi$ -electron bare ring be planar?

Gerardo Martínez-Guajardo,<sup>1</sup> Zeferino Gómez-Saldoval,<sup>2</sup> Daniel F. Jana,<sup>3</sup> Patrizia Calaminici,<sup>4,\*</sup> Clemence Corminboeuf,<sup>3,\*</sup> and Gabriel Merino.<sup>1,\*</sup>

<sup>1</sup> Departamento de Química, Universidad de Guanajuato, Noria Alta s/n C.P. 36050, Guanajuato, Gto. México; <sup>2</sup> Facultad de Ciencias Químicas, Universidad de Colima, Carretera Colima Coquimatlán km 9 s/n, CP 28400, Coquimatlán, Colima, México; <sup>3</sup> Institut des Sciences et Ingénierie Chimiques, Ecole Polytechnique Fédérale de Lausanne (EPFL), Batochime, CH-1015, Lausanne, Switzerland; <sup>4</sup> Departamento de Química, CINVESTAV, Avenida Instituto Politécnico Nacional 2508, A.P. 14-740, México D.F. 07000 México  
[gmerino@quijote.ugto.mx](mailto:gmerino@quijote.ugto.mx); [clemence.corminboeuf@epfl.ch](mailto:clemence.corminboeuf@epfl.ch); [pcalamin@cinvestav.mx](mailto:pcalamin@cinvestav.mx)

#### 1. Structures and Energies

All structures have been optimized at the B3LYP/def2-TZVPP level. All the energy values include the ZPE correction.

##### C4Si4H8

E = -1315.194055

|    |           |           |          |
|----|-----------|-----------|----------|
| Si | 1.625294  | 1.625294  | 0.000000 |
| C  | 0.000000  | 2.274484  | 0.000000 |
| Si | -1.625294 | 1.625294  | 0.000000 |
| C  | -2.274484 | 0.000000  | 0.000000 |
| Si | -1.625294 | -1.625294 | 0.000000 |
| C  | 0.000000  | -2.274484 | 0.000000 |
| Si | 1.625294  | -1.625294 | 0.000000 |
| C  | 2.274484  | 0.000000  | 0.000000 |
| H  | -2.670821 | 2.670821  | 0.000000 |
| H  | -3.362538 | 0.000000  | 0.000000 |
| H  | -2.670821 | -2.670821 | 0.000000 |
| H  | 0.000000  | -3.362538 | 0.000000 |
| H  | 2.670821  | -2.670821 | 0.000000 |
| H  | 3.362538  | 0.000000  | 0.000000 |
| H  | 2.670821  | 2.670821  | 0.000000 |
| H  | 0.000000  | 3.362538  | 0.000000 |

##### C4Ge5H8

E = -8465.251794

|    |           |           |          |
|----|-----------|-----------|----------|
| Ge | 1.694935  | 1.694935  | 0.000000 |
| C  | 0.000000  | 2.395711  | 0.000000 |
| Ge | -1.694935 | 1.694935  | 0.000000 |
| C  | -2.395711 | 0.000000  | 0.000000 |
| Ge | -1.694935 | -1.694935 | 0.000000 |
| C  | 0.000000  | -2.395711 | 0.000000 |

|    |           |           |          |
|----|-----------|-----------|----------|
| Ge | 1.694935  | -1.694935 | 0.000000 |
| C  | 2.395711  | 0.000000  | 0.000000 |
| H  | -2.783201 | 2.783201  | 0.000000 |
| H  | -3.479764 | 0.000000  | 0.000000 |
| H  | -2.783201 | -2.783201 | 0.000000 |
| H  | 0.000000  | -3.479764 | 0.000000 |
| H  | 2.783201  | -2.783201 | 0.000000 |
| H  | 3.479764  | 0.000000  | 0.000000 |
| H  | 2.783201  | 2.783201  | 0.000000 |
| H  | 0.000000  | 3.479764  | 0.000000 |

C4SnH8

E = -1014.462543

|    |           |           |          |
|----|-----------|-----------|----------|
| Sn | 1.867878  | 1.867878  | 0.000000 |
| C  | 0.000000  | 2.640056  | 0.000000 |
| Sn | -1.867878 | 1.867878  | 0.000000 |
| C  | -2.640056 | 0.000000  | 0.000000 |
| Sn | -1.867878 | -1.867878 | 0.000000 |
| C  | 0.000000  | -2.640056 | 0.000000 |
| Sn | 1.867878  | -1.867878 | 0.000000 |
| C  | 2.640056  | 0.000000  | 0.000000 |
| H  | 0.000000  | 3.724359  | 0.000000 |
| H  | -3.083821 | 3.083821  | 0.000000 |
| H  | 0.000000  | -3.724359 | 0.000000 |
| H  | 3.083821  | -3.083821 | 0.000000 |
| H  | -3.724359 | 0.000000  | 0.000000 |
| H  | -3.083821 | -3.083821 | 0.000000 |
| H  | 3.083821  | 3.083821  | 0.000000 |
| H  | 3.724359  | 0.000000  | 0.000000 |

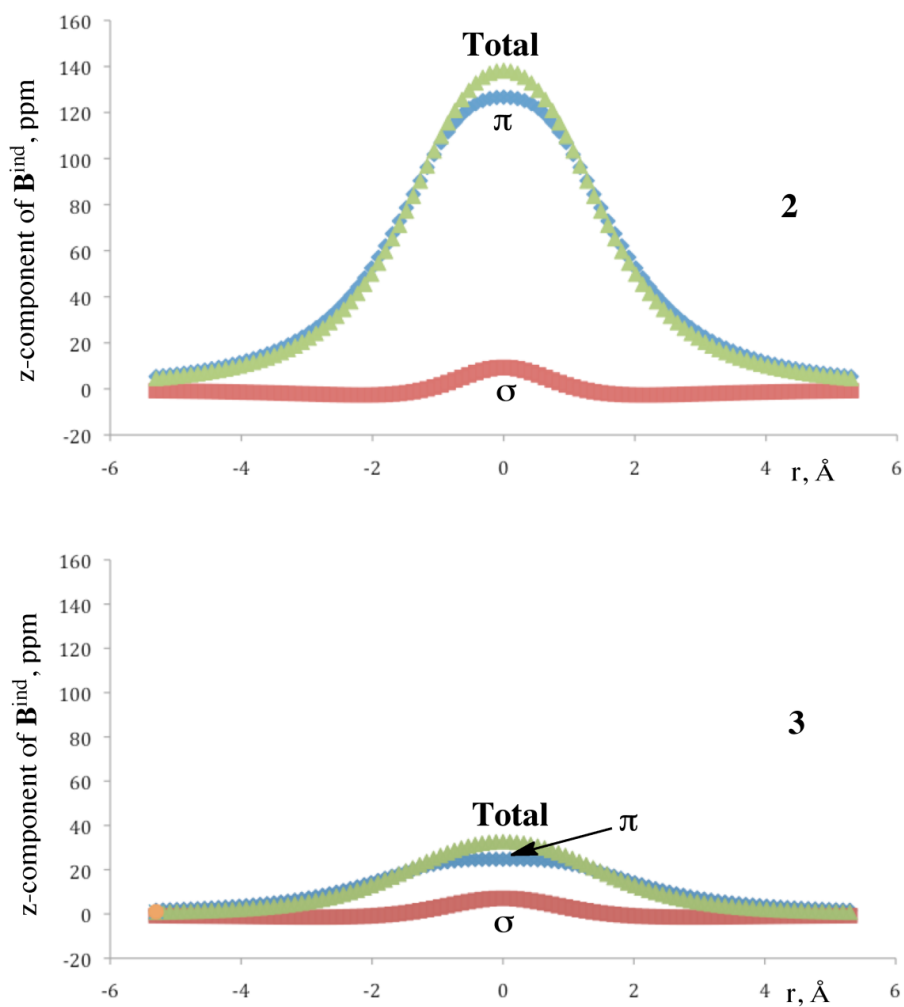

**Figure 1-SI.**  $B_z^{\text{ind}}$  profiles, including the orbital contributions, of **2**, **3**, and **4**

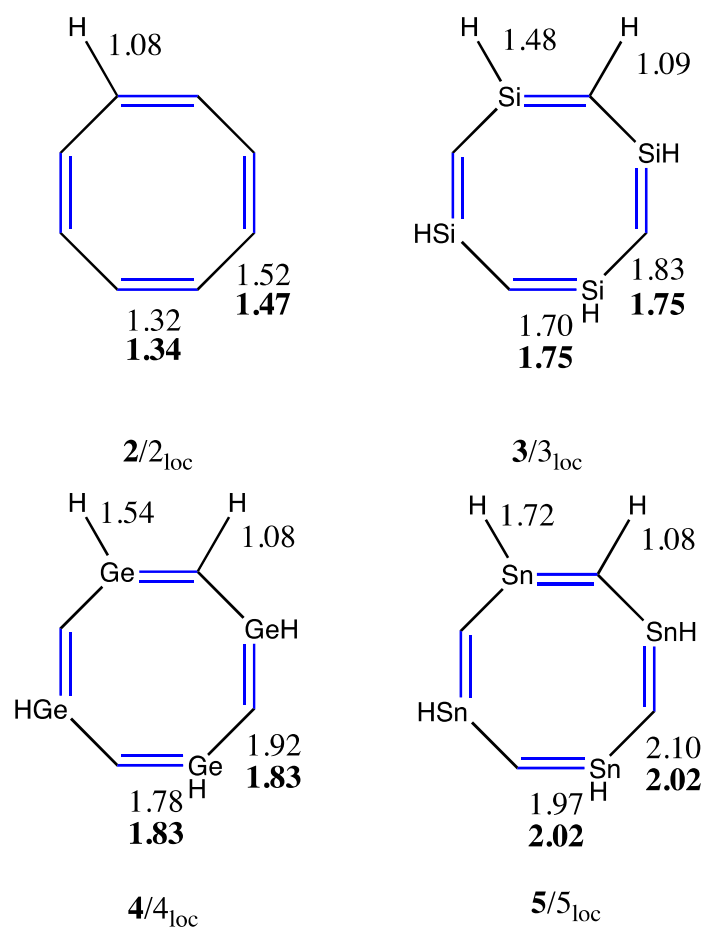

**Figure 2-SI.** (BLW)-B3LYP/def2-TZVPP bond lengths are given in Angstrom for **2**, **3** and **4** and the optimized localized Lewis structures  $2_{loc}$ ,  $3_{loc}$  and  $4_{loc}$ . The block-double bonds are indicated in blue.
